# Supplementary material
Source: publisher figshare collection journal article supplement (https://acs.figshare.com/ndownloader/files/4354381)
Supplement: Supplementary file 1 [file 4354381]

# **Self-Templating of Metal-Driven Supramolecular Self-Assembly: A General Approach toward 1D Inorganic Nanotubes**

*Yan Qiao, Yijie Wang, Zhiyi Yang, Yiyang Lin and Jianbin Huang\**

† Beijing National Laboratory for Molecular Sciences (BNLMS), State Key Laboratory for Structural Chemistry of Unstable and Stable Species, College of Chemistry and Molecular Engineering, Peking University, Beijing 100871, China

\* To whom correspondence should be addressed. Phone: (+86) 10-6275-3557. Fax: (+86) 10-6275-1708. E-mail: [JBhuang@pku.edu.cn](mailto:JBhuang@pku.edu.cn)

## Supporting Information

### *1. FE-SEM study of zinc-cholate supramolecular nanofiber*

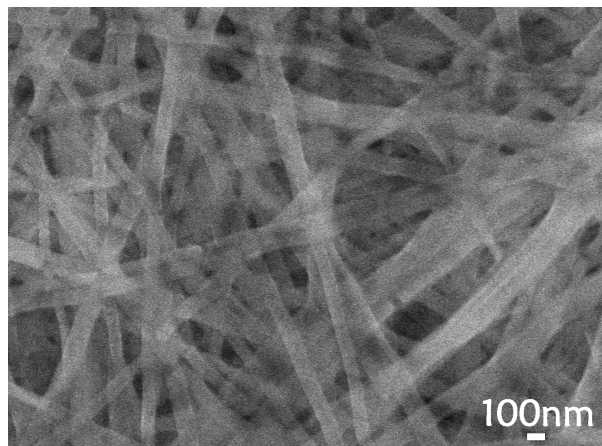

**Figure S1.** FE-SEM image of zinc-cholate supramolecular nanofibers at 25 °C.

### *2. High-resolution TEM (HRTEM) image of ZnS nanotube*

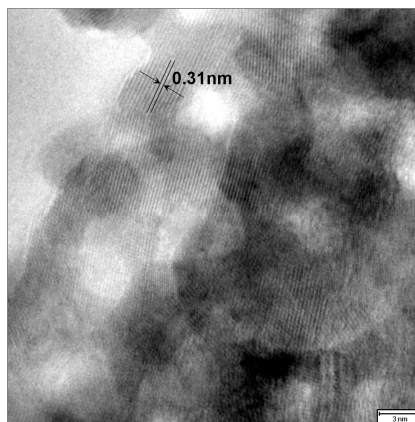

**Figure S2.** High-resolution TEM (HRTEM) image of ZnS nanotube.

### 3. TEM studies of nanofibers in zinc-cholate supramolecular systems

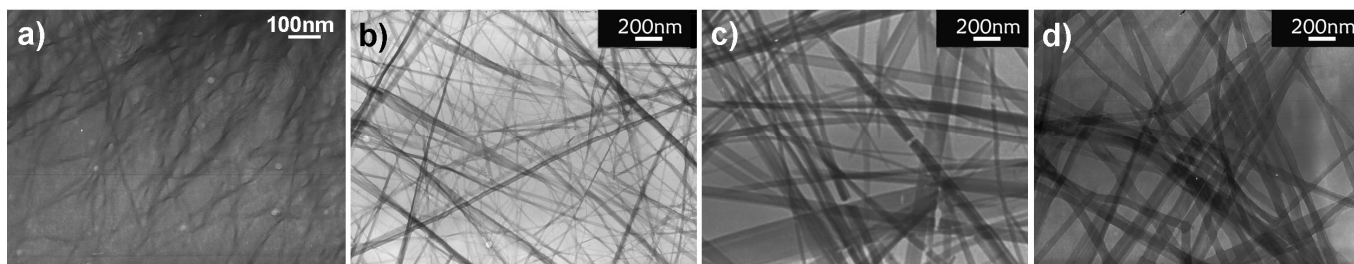

**Figure S3.** TEM images of the nanofibers showing different diameter in 5 mM/5 mM zinc-cholate systems with different incubation time: a) 30 min; b) 1 hour; c) 4 hours; d) 6 hours.

### 4. Histograms of width distribution studies of zinc-cholate supramolecular system and as prepared ZnS nanotubes

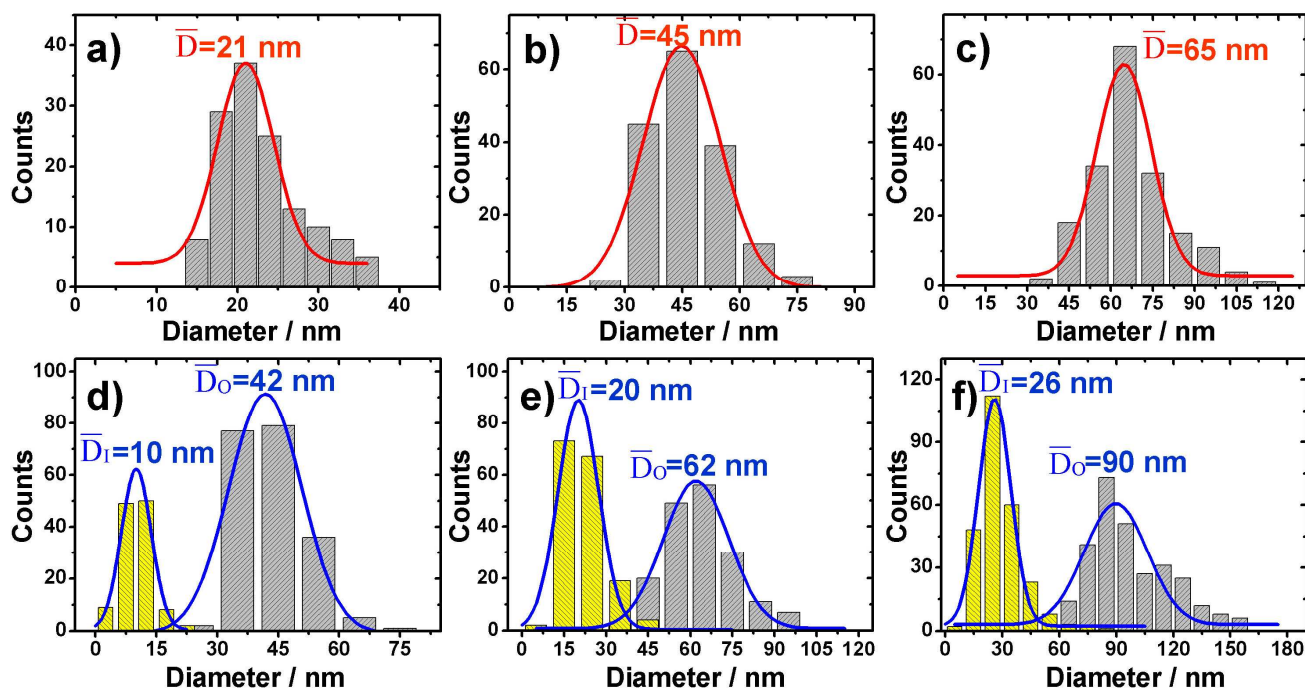

**Figure S4.** Histograms of diameter distribution zinc-cholate supramolecular nanofibers incubated at 20 °C for: a) 3h; b) 12h; c) 24h and as prepared zinc sulfide nanotubes d) 3h; e) 12h; f) 24h.

5. TEM studies of helical zinc sulfide nanotubes prepared by self-templating strategy

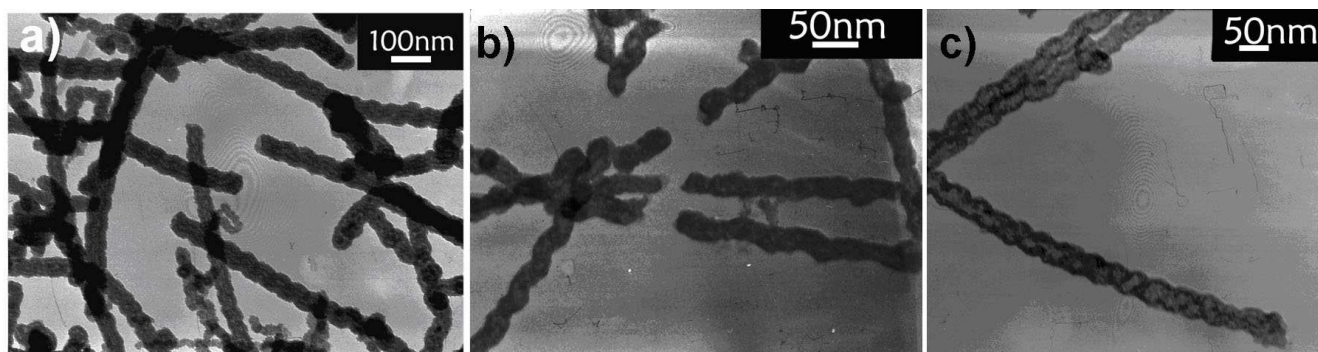

**Figure S5.** TEM images of zinc sulfide helical nanotubes at 20 °C for incubated 3 hours.

6. Zinc sulfide helical nanotube with adjustable diameter and helix pitches

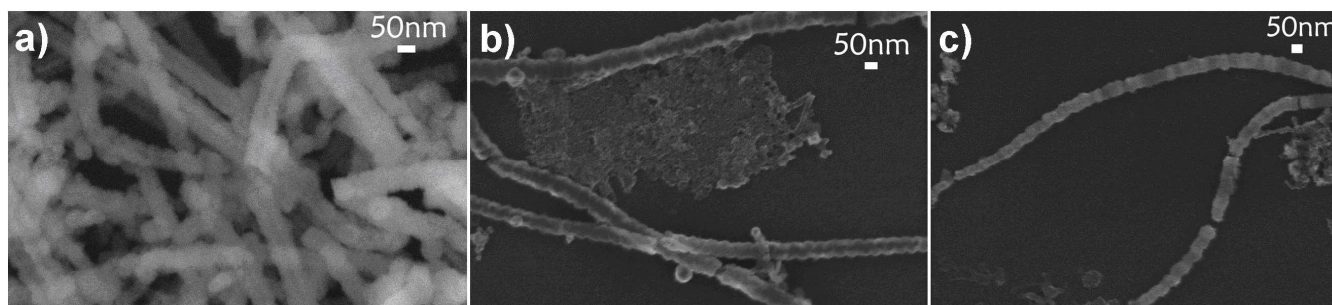

**Figure S6.** SEM images of zinc sulfide helical nanotubes prepared at 20 °C with different diameters.

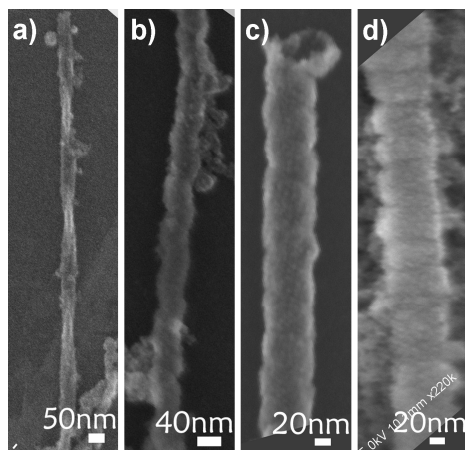



**Figure S7.** SEM images of zinc sulfide helical nanotubes prepared at 20 °C with different helical pitches.

7. A snapshot of intermediate state of zinc sulfide nanotube formation

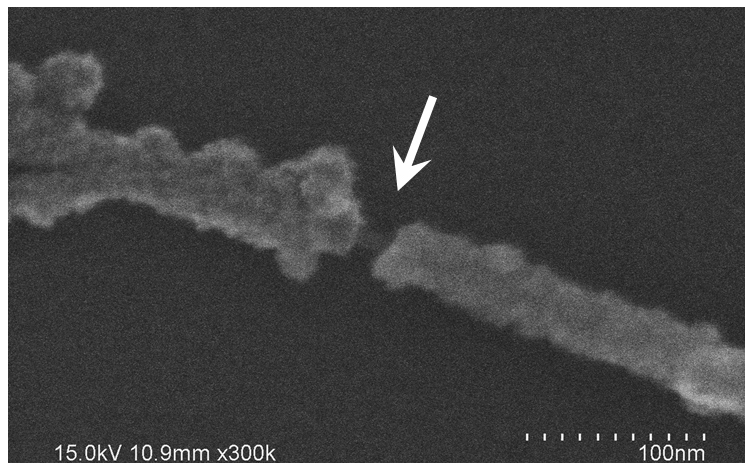

**Figure S8.** SEM image of intermediate state of zinc sulfide nanotube formation as step 2 shows. The arrow clearly indicates the broken tube and the fiber template.

8. Histograms of width distribution studies of metal-cholate nanofiber and metal sulfide nanotubes

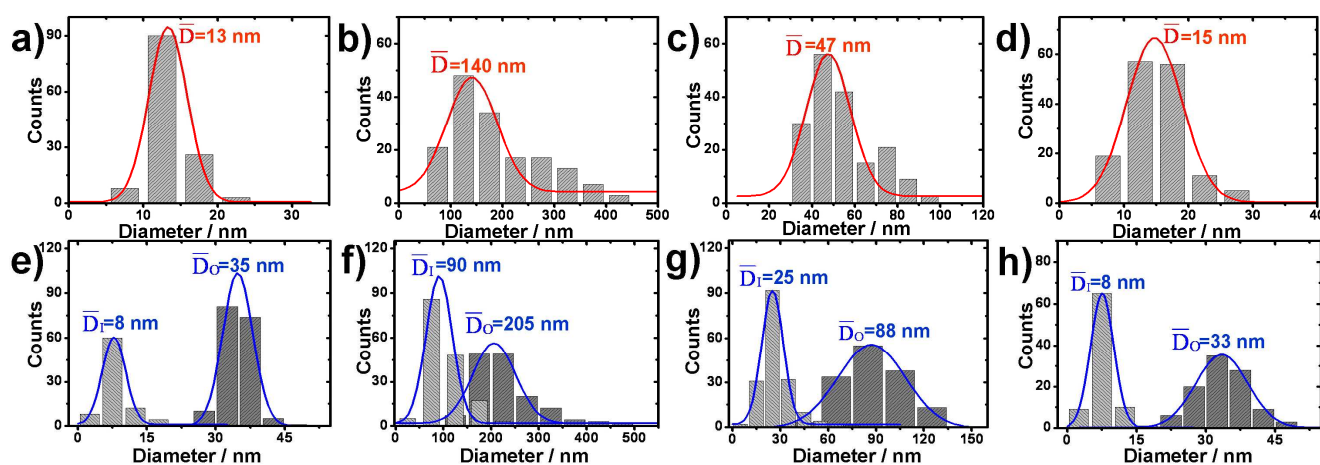

**Figure S9.** Histograms of width distribution metal-cholate supramolecular nanofibers incubated at 25 °C for: a)  $\text{Cu}^{2+}$ ; b)  $\text{Ni}^{2+}$ ; c)  $\text{Cd}^{2+}$ ; d)  $\text{Co}^{2+}$ ; and as prepared metal sulfide nanotubes: e) CuS; f) NiS; g) CdS; h) CoS.

9. TEM, ED, HR-TEM, EDS and XRD studies of metal sulfides nanotubes prepared by self-templating strategy

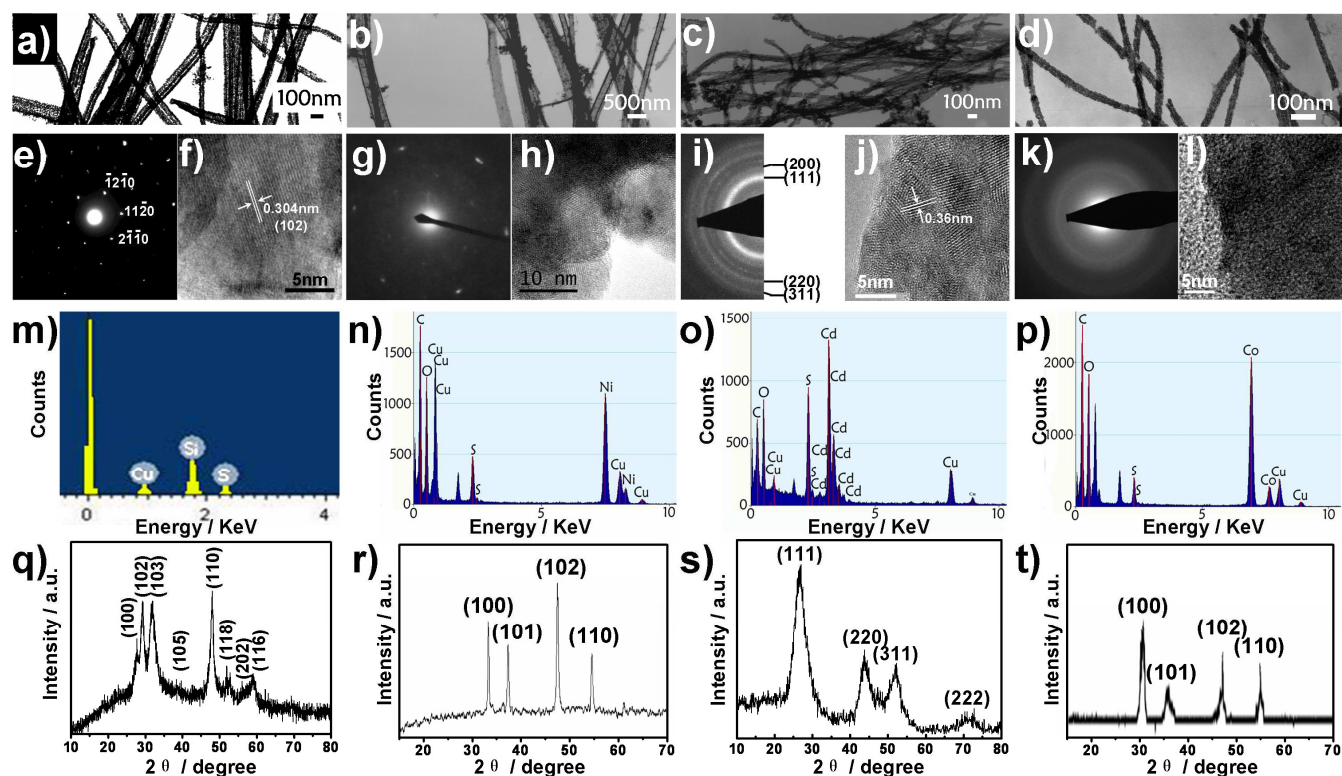

**Figure S10.** Metal sulfides nanotubes prepared by self-templating strategy. TEM images (a, b, c, d), ED pattern (e, g, i, k), HR-TEM images (f, h, j, l), EDS (m, n, o, p), XRD spectra (q, r, s, t) and for as-synthesized nanotubes of CuS (a, e, f, m, q), NiS (b, g, h, n, r), CdS (c, i, j, o, s) and CoS (d, k, l, p, t).

10. HR-TEM, ED, width distribution and EDS studies of zinc chalcogenides nanotubes prepared by self-templating strategy

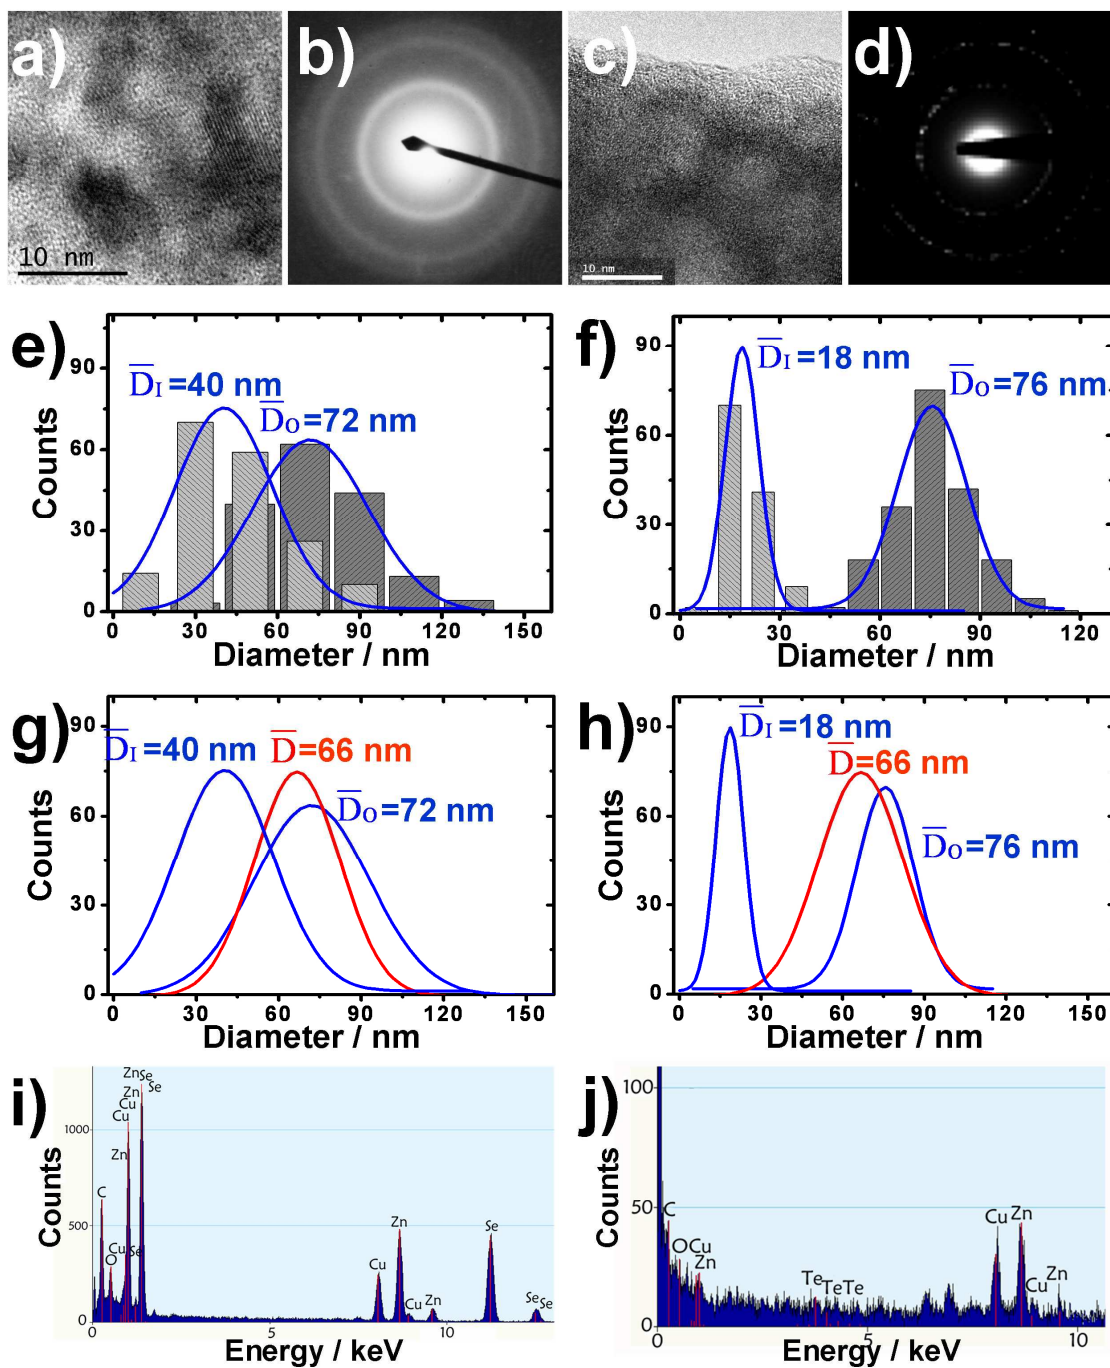

**Figure S11.** Zinc chalcogenides nanotubes prepared by self-templating strategy. HR-TEM images (a, c), ED pattern (b, d), width distribution (e, f, g, h), EDS (i, j) and for as-synthesized nanotubes of ZnSe (a, b, e, g, i), ZnTe (c, d, f, h, j).
